# Supplementary material
Source: publisher site journal article supplement (https://www.dovepress.com/article/568990)
Supplement: Supplementary file 1 [file 568990%20Revised%20eTables%201-2.docx]

eTable 1. Baseline Patient Characteristics Among Managed Medicaid and Commercial Beneficiaries

|  | Managed Medicaid N = 1,760 | Commercial N = 1,335 |
| --- | --- | --- |
|
| Age, mean (SD) | 41.5 (15.4) | 51.2 (12.7) |
| Age group, n (%) |  |  |
| 12-39 | 725 (41.2%) | 226 (16.9%) |
| 40-49 | 428 (24.3%) | 280 (21.0%) |
| 50-64 | 555 (31.5%) | 720 (53.9%) |
| 65+ | 52 (3.0%) | 109 (8.2%) |
| Sex, n (%) |  |  |
| Male | 473 (26.9%) | 457 (34.2%) |
| Female | 1,287 (73.1%) | 878 (65.8%) |
| Census region, n (%) |  |  |
| Northeast | 604 (34.3%) | 200 (15.0%) |
| Midwest | 324 (18.4%) | 357 (26.7%) |
| South | 562 (31.9%) | 560 (41.9%) |
| West/U.S. Territory/Unknown | 270 (15.3%) | 218 (16.3%) |
| Elixhauser Comorbidity Index, mean (SD) | 4.2 (6.7) | 4.0 (5.3) |
| Comorbidities, n (%) |  |  |
| Allergic rhinitis | 1,184 (67.3%) | 998 (74.8%) |
| Anxiety | 742 (42.2%) | 414 (31.0%) |
| Atopic dermatitis | 119 (6.8%) | 054 (4.0%) |
| Chronic sinusitis | 384 (21.8%) | 519 (38.9%) |
| Chronic urticaria | 102 (5.8%) | 84 (6.3%) |
| Chronic obstructive pulmonary disease (COPD) | 752 (42.7%) | 472 (35.4%) |
| Dyslipidemia | 558 (31.7%) | 484 (36.3%) |
| Eosinophilic esophagitis | 32 (1.8%) | 30 (2.2%) |
| Gastroesophageal reflux disease | 863 (49.0%) | 612 (45.8%) |
| Insomnia | 066 (3.8%) | 51 (3.8%) |
| Ischemic heart disease | 134 (7.6%) | 105 (7.9%) |
| Nasal polyps | 119 (6.8%) | 211 (15.8%) |
| Sleep apnea | 597 (33.9%) | 428 (32.1%) |
| Tobacco dependence | 350 (19.9%) | 95 (7.1%) |
| Vocal cord dysfunction | 72 (4.1%) | 50 (3.7%) |

eTable 2. Annual Asthma Exacerbation Rate (AAER) Reduction and Exacerbation-Related Medical Costs Among Managed Medicaid and Commercial Beneficiaries

|  | Managed Medicaid N = 1,760 | | | | Commercial N = 1,335 | | | |
| --- | --- | --- | --- | --- | --- | --- | --- | --- |
|
|  | Pre Index | Post Index | Relative Change (%) | *P* | Pre Index | Post Index | Relative Change (%) | *P* |
| **Asthma exacerbations** | | | | | | | | |
| Presence of ≥ 1 exacerbation, n (%) | 1,760 (100.0%) | 1,392 (79.1%) | -21% |  | 1,335 (100.0%) | 936 (70.1%) | -30% |  |
| AAER, mean (SD) | 4.3 (2.3) | 2.6 (2.5) | -39% | <0.001 | 3.7 (1.9) | 2.0 (2.2) | -47% | <0.001 |
| Number of exacerbations, n (%) |  |  |  |  |  |  |  |  |
| 1 exacerbation | 0 (0.0%) | 369 (21.0%) | N/A |  | 0 (0.0%) | 316 (23.7%) | N/A |  |
| 2 exacerbations | 466 (26.5%) | 314 (17.8%) | -33% |  | 446 (33.4%) | 232 (17.4%) | -48% |  |
| 3 exacerbations | 385 (21.9%) | 215 (12.2%) | -44% |  | 332 (24.9%) | 128 (9.6%) | -61% |  |
| 4+ exacerbations | 909 (51.6%) | 494 (28.1%) | -46% |  | 557 (41.7%) | 260 (19.5%) | -53% |  |
| **Exacerbation-related medical costs** | | | | | | | | |
| Physician office visits, mean (SD) | $190 ($165) | $93 ($127) | -51% | <0.001 | $209 ($162) | $81 ($119) | -61% | <0.001 |
| Median | $161 | $5 |  |  | $189 | $0 |  |  |
| Emergency department, mean (SD) | $291 ($484) | $143 ($364) | -51% | <0.001 | $91 ($250) | $31 ($155) | -66% | <0.001 |
| Median | $0 | $0 |  |  | $0 | $0 |  |  |
| Other outpatient, mean (SD) | $204 ($3364) | $66 ($292) | -68% | <0.001 | $143 ($548) | $56 ($237) | -60% | <0.001 |
| Median | $0 | $0 |  |  | $44 | $0 |  |  |
| Inpatient, mean (SD) | $1,394 ($4,229) | $576 ($3,262) | -59% | <0.001 | $352 ($1,799) | $214 ($1,745) | -39% | <0.001 |
| Median | $0 | $0 |  |  | $0 | $0 |  |  |
| Total medical, mean (SD) | $2,079 ($5,460) | $877 ($3,372) | -58% | <0.001 | $794 ($1,902) | $382 ($1,782) | -52% | <0.001 |
| Median | $481 | $149 |  |  | $325 | $87 |  |  |
